# Supplementary material for: Improving maps of forest aboveground biomass: A combined approach using machine learning with a spatial statistical model
Source: Copernicus journal article supplement (doi:10.5194/bg-2020-36), 2020-02-25
Supplement: Supplementary file [file bg-2020-36-AC5-supplement.pdf]

Institute of Urban Environment,  
Chinese Academy of Sciences,  
CN 361021, China

Dr. Yin Ren

Email: [yren@iue.ac.cn](mailto:yren@iue.ac.cn)

5<sup>th</sup> Jun 2020

*Interactive comment on “Improving maps of forest aboveground biomass: A combined approach using machine learning with a spatial statistical model” by Shaoqing Dai et al. (Additional Response to Anonymous Referee #1)*

Shaoqing Dai et al.

[yren@iue.ac.cn](mailto:yren@iue.ac.cn)

Dear Editor,

Thank you for your email and the reviewer’s comments concerning our manuscript entitled “Improving maps of forest aboveground biomass: A combined approach using machine learning with a spatial statistical model” (ID: bg-2020-36). We thank the reviewer for the very helpful comments.

**Additional reply to reviewer’s comments:**

Dear reviewer,

Anonymous Reviewer #2 recommended that we re-evaluate the performance of the machine learning models with additional predictors (at least latitude). For your convenience, the comments of anonymous reviewer #2 are listed below:

“b) They claim that the joint model combines the advantages of ML and the P-BSHADE model, the predictive non-linearity advantage of ML and the ability of the P-BSHADE to capture spatial relationships. However, if they are given the chance I think that ML models are also capable of detecting and using spatial relationships, that means, you have to provide them not only longitude but also latitude as predictor! Based on correlation with AGB, the authors selected only longitude, however, I would assume that an interaction of longitude and latitude would be a good predictor of spatial relationships (two variables of an interaction can show by themselves low correlation). Moreover, ML models such as RF are outstanding in detecting interactions and higher-order interactions (if they are given the chance). Also, hyper-parameter tuning is important in ML to improve predictive performance, even for RF! (e.g. see Probest et al., 2019 <https://doi.org/10.1002/widm.1301>). I recommend that the authors re-evaluate the performance of the ML models with hyper-parameter tuning, nested cross-validation, and additional predictors (at least latitude).”

We think this comment is relate to your General Comment 2). For your convenience, your comment is presented here:

“2) The cross-validation strategy that you used is not suitable if you have spatially clustered data (as you obviously have looking at the map). This is shown by several studies (see references below, to mention just a few). What would be appropriate is a spatial cross-validation that is testing the ability of your model to make predictions for spatially new samples. At least you should take care that you never use data points from the same forest patch for both training and testing. Otherwise, it is not possible to evaluate the ability of your models for regional mapping. Including coordinates as predictors when the data are spatially clustered is very dangerous (see Meyer et al 2019) and can lead to high overfitting which can only be revealed with spatial cross-validation. So I recommend that in addition to spatial cross-validation, to perform a spatial variable selection (i.e. can the predictors be used to make predictions for new locations?)

1. Meyer, H., Reudenbach, C., Wöllauer, S., Nauss, T., 2019. Importance of spatial predictor variable selection in machine learning applications - Moving from data reproduction to spatial prediction. *Ecological Modelling*. 411, 108815.

2. Pohjankukka, J., Pahikkala, T., Nevalainen, P., Heikkonen, J., 2017. Estimating the prediction performance of spatial models via spatial k-fold cross validation. *Int. J. Geogr. Inform. Sci.* 31, 2001–2019. <https://doi.org/10.1080/13658816.2017.1346255>.
3. Roberts, D.R., Bahn, V., Ciuti, S., Boyce, M.S., Elith, J., Guillera-Aroita, G., Hauenstein, S., Lahoz-Monfort, J.J., Schröder, B., Thuiller, W., Warton, D.I., Wintle, B.A., Hartig, F., Dormann, C.F., 2017. Cross-validation strategies for data with temporal, spatial, hierarchical, or phylogenetic structure. *Ecography*.
4. Valavi, R., Elith, J., Lahoz-Monfort, J.J., Guillera-Aroita, G., 2018. blockcv: an r package for generating spatially or environmentally separated folds for k-fold cross validation of species distribution models. *BioRxiv*.”

To test whether include or exclude latitude, and whether leave-one out cross-validation or spatial block cross-validation would have impact on models performance in the forest AGB estimation, we re-build the model and evaluate the results again. We found that there has a error on Figure 1 to 3 in the previous response to your comments (<https://www.biogeosciences-discuss.net/bg-2020-36/bg-2020-36-AC3-supplement.pdf>). All the results were correct in this response. Therefore, we revised and presented the final results including six situations in Table 1:

The results from comparing situation 2 and 5 showed that cross validation strategy has significant impact on the ML models and P-BSHADE model, but showed limited impact on the three combination models. We agree with your comments and suggestions and decided to adopt spatial block cross-validation.

The results showed that using both longitude and latitude as predictors did not improve the performance of RF, SVM, or RBF-ANN. However, this does not mean that machine learning cannot capture the spatial relationships. We also show that the combination of three MLs and P-BSHADE can all improve the prediction accuracy compared to the single ML in all of the situations. We think that this further illustrates the advantages of the combined models.

Table 1 Performance of models in different predictor situations

| Model                                                                                     | MAE    | MRE   | RMSE   | nRMSE |
|-------------------------------------------------------------------------------------------|--------|-------|--------|-------|
| Situation 1: includes longitude and latitude with spatial block cross-validation          |        |       |        |       |
| SVM                                                                                       | 18.260 | 2.260 | 25.929 | 0.548 |
| RBF-ANN                                                                                   | 14.665 | 0.324 | 21.429 | 0.453 |
| RF                                                                                        | 16.435 | 1.292 | 27.419 | 0.579 |
| P-BSHADE                                                                                  | 12.069 | 0.251 | 19.490 | 0.412 |
| SVM & P-BSHADE                                                                            | 5.075  | 0.108 | 6.495  | 0.137 |
| RBF-ANN & P-BSHADE                                                                        | 12.164 | 0.244 | 17.546 | 0.371 |
| RF & P-BSHADE                                                                             | 6.344  | 0.153 | 12.279 | 0.259 |
| Allometric Model                                                                          | 16.412 | 0.577 | 25.080 | 0.530 |
| Situation 2: includes longitude but excludes latitude with spatial block cross-validation |        |       |        |       |
| SVM                                                                                       | 13.659 | 1.382 | 20.251 | 0.428 |
| RBF-ANN                                                                                   | 14.884 | 0.324 | 20.719 | 0.438 |
| RF                                                                                        | 14.919 | 1.107 | 21.371 | 0.451 |
| P-BSHADE                                                                                  | 12.069 | 0.251 | 19.490 | 0.412 |
| SVM & P-BSHADE                                                                            | 6.879  | 0.128 | 10.757 | 0.227 |
| RBF-ANN & P-BSHADE                                                                        | 12.597 | 0.260 | 17.819 | 0.376 |
| RF & P-BSHADE                                                                             | 5.816  | 0.137 | 9.520  | 0.201 |
| Allometric Model                                                                          | 16.412 | 0.577 | 25.080 | 0.530 |
| Situation 3: excludes longitude and latitude with spatial block cross-validation          |        |       |        |       |
| SVM                                                                                       | 15.824 | 2.034 | 21.609 | 0.456 |
| RBF-ANN                                                                                   | 14.175 | 0.373 | 20.354 | 0.430 |
| RF                                                                                        | 15.201 | 1.092 | 21.330 | 0.451 |
| P-BSHADE                                                                                  | 12.069 | 0.251 | 19.490 | 0.412 |
| SVM & P-BSHADE                                                                            | 9.679  | 0.173 | 16.055 | 0.339 |
| RBF-ANN & P-BSHADE                                                                        | 12.227 | 0.232 | 18.124 | 0.383 |
| RF & P-BSHADE                                                                             | 6.104  | 0.136 | 9.911  | 0.209 |
| Allometric Model                                                                          | 16.412 | 0.577 | 25.080 | 0.530 |
| Situation 4: includes longitude and latitude with leave-one out cross-validation          |        |       |        |       |
| SVM                                                                                       | 8.208  | 0.220 | 11.064 | 0.232 |
| RBF-ANN                                                                                   | 12.710 | 0.268 | 19.466 | 0.409 |
| RF                                                                                        | 10.696 | 0.289 | 20.012 | 0.420 |
| P-BSHADE                                                                                  | 12.045 | 0.279 | 19.781 | 0.415 |
| SVM & P-BSHADE                                                                            | 5.214  | 0.110 | 6.668  | 0.140 |
| RBF-ANN & P-BSHADE                                                                        | 11.876 | 0.224 | 17.479 | 0.367 |
| RF & P-BSHADE                                                                             | 5.853  | 0.145 | 10.963 | 0.230 |

| Situation 5: includes longitude and excludes latitude with leave-one out cross-validation(in submitted article) |        |       |        |       |
|-----------------------------------------------------------------------------------------------------------------|--------|-------|--------|-------|
| SVM                                                                                                             | 11.168 | 0.248 | 10.388 | 0.218 |
| RBF-ANN                                                                                                         | 12.149 | 0.267 | 10.388 | 0.218 |
| RF                                                                                                              | 10.155 | 0.259 | 9.428  | 0.198 |
| P-BSHADE                                                                                                        | 18.371 | 0.391 | 14.077 | 0.296 |
| SVM & P-BSHADE                                                                                                  | 6.883  | 0.125 | 6.304  | 0.132 |
| RBF-ANN & P-BSHADE                                                                                              | 10.136 | 0.205 | 9.633  | 0.202 |
| RF & P-BSHADE                                                                                                   | 5.679  | 0.130 | 5.299  | 0.111 |
| Situation 6: excludes longitude and latitude with leave-one out cross-validation                                |        |       |        |       |
| SVM                                                                                                             | 11.473 | 0.240 | 18.426 | 0.387 |
| RBF-ANN                                                                                                         | 12.674 | 0.269 | 18.584 | 0.390 |
| RF                                                                                                              | 10.759 | 0.232 | 17.043 | 0.358 |
| P-BSHADE                                                                                                        | 12.045 | 0.279 | 19.781 | 0.415 |
| SVM & P-BSHADE                                                                                                  | 9.203  | 0.157 | 15.977 | 0.336 |
| RBF-ANN & P-BSHADE                                                                                              | 16.282 | 0.395 | 27.770 | 0.583 |
| RF & P-BSHADE                                                                                                   | 5.933  | 0.122 | 9.765  | 0.205 |

Note: MAE: mean absolute error; MRE: mean relative error; RMSE: root mean square error; nRMSE: normalized root mean square error

We thank the reviewer and remain at your disposal for any further questions.

Yours sincerely,

Yin Ren
